# Supplementary material
Source: PubMed Central journal article supplement (PMC8595251)
Supplement: mmc1.pdf [file mmc1.pdf]

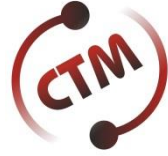

CAN TRANSLATION AND EDITING SERVICES

# EDITORIAL CERTIFICATE

This hereby certifies that the manuscript listed below has been edited for English language, grammar, punctuation, spelling, and overall style by one or more Native English editors at Can Translation and Editing Services.

**MANUSCRIPT TITLE:**

The Experience of Midwives in Turkey Who Provide Care to Pregnant Women Infected with COVID-19: A Qualitative Study

**CORRESPONDING AUTHOR:**

Kevser OZDEMIR

**DATE OF ISSUE:**

17.03.2021

**CONTACT:**

info@cantercume.com.tr

**Managing Director–Emre CAN**

Reference Number: [03508](#)

**CTM CAN TERCÜMANLIK MERKEZİ CO. LTD.**

Barbaros Mah. Tunalı Hilmi Cad. No: 57/31 Çankaya – Ankara/TURKEY

Tel&Fax: +90 312 419 8323 E-mail: info@cantercume.com.tr

www.cantercume.com.tr
